# Supplementary material for: Nucleolin binds to and regulates transcription of hepatitis B virus covalently closed circular DNA minichromosome
Source: PubMed Central journal article supplement — Proc Natl Acad Sci U S A. 2023 Nov 28;120(49):e2306390120. doi: 10.1073/pnas.2306390120 (PMC10710063; doi:10.1073/pnas.2306390120), 2023-11-28
Supplement: pnas.2306390120.sd01.pdf [file pnas.2306390120.sd01.pdf]

**Dataset S1: Enrichment of nuclear proteins by anti-HBc precipitation**

| <b>Gene names</b>    | <b>Cross-linking Fold-enrichment</b> | <b>Cross-linking / no cross-linking</b> |
|----------------------|--------------------------------------|-----------------------------------------|
| ABHD12               | 5.6566                               | 5.0473                                  |
| ACAA2                | 7.8989                               | 12.975                                  |
| ACAD10               | 4.166                                | 7.6103                                  |
| ACAD9                | 12.093                               | 4.1860                                  |
| ACADVL               | 5.9003                               | 10.601                                  |
| ACAT1                | 14.113                               | 10.444                                  |
| ACIN1                | 3.4386                               | 4.2490                                  |
| ACO2                 | 7.8032                               | 18.118                                  |
| ACOT1;ACOT2          | 6.2785                               | 15.491                                  |
| ACP1                 | 7.8293                               | 6.2132                                  |
| ACSL3                | 6.6419                               | 6.3999                                  |
| ACSM2B;ACSM2A        | 5.1981                               | 13.567                                  |
| ACTC1;ACTA1          | 5.9782                               | 7.1620                                  |
| ACTG1;ACTB           | 5.5922                               | 7.1326                                  |
| ACTR3;ACTR3B         | 5.0191                               | 8.1953                                  |
| ADH5                 | 3.1552                               | 4.8671                                  |
| AGMAT                | 4.4064                               | 5.0933                                  |
| AHCY                 | 3.9484                               | 7.2470                                  |
| AK2                  | 8.2466                               | 14.570                                  |
| AK3                  | 3.2178                               | 7.4665                                  |
| AK4                  | 5.9073                               | 8.6736                                  |
| AKR1C3;AKR1C1;AKR1C4 | 3.9223                               | 9.8288                                  |
| ALDH18A1             | 7.6726                               | 9.9750                                  |
| ALDH1L1              | 30.015                               | 28.849                                  |
| ALDH2                | 3.4746                               | 6.5575                                  |
| ALDH5A1              | 4.0714                               | 6.7823                                  |
| ALDH6A1              | 9.2066                               | 9.8122                                  |
| ALDOA                | 3.4647                               | 5.0934                                  |
| ALDOC                | 3.4726                               | 4.9857                                  |
| ANXA4                | 7.1205                               | 17.181                                  |
| AP2A1                | 7.6963                               | 16.666                                  |
| APEX1                | 8.8808                               | 14.274                                  |
| APLP2                | 4.9785                               | 5.9048                                  |
| ARMCX3               | 7.5148                               | 8.9491                                  |

|             |        |        |
|-------------|--------|--------|
| ASPH        | 8.2892 | 11.275 |
| ATAD3A      | 7.5644 | 8.5836 |
| ATIC        | 6.7674 | 14.984 |
| ATP5B       | 10.93  | 4.6773 |
| ATP5SL      | 17.884 | 16.133 |
| ATP6V0D1    | 6.2719 | 6.6647 |
| AUH         | 19.665 | 9.6524 |
| BABAM1      | 6.4504 | 5.8438 |
| BCAS2       | 5.2213 | 8.3447 |
| BCKDK       | 8.0325 | 5.9681 |
| BCLAF1      | 12.99  | 20.874 |
| BHMT;BHMT2  | 5.956  | 7.6620 |
| BUB3        | 10.955 | 12.139 |
| C14orf166   | 6.2376 | 5.2847 |
| C1QBP       | 27.118 | 21.760 |
| C4B;C4A     | 13.764 | 13.666 |
| CALCOCO2    | 8.7198 | 9.3796 |
| CALM1;CALM2 | 7.3664 | 13.579 |
| CALU        | 4.2558 | 4.0274 |
| CAMK2D      | 4.0576 | 5.9696 |
| CANX        | 4.8595 | 7.1404 |
| CBX3        | 7.0701 | 6.6970 |
| CCAR2       | 4.2872 | 5.9416 |
| CCT2        | 5.0841 | 8.3905 |
| CCT5        | 3.8453 | 4.1000 |
| CCT6A       | 3.7118 | 5.3986 |
| CDKN2AIP    | 7.7753 | 4.8950 |
| CFL1        | 3.6693 | 5.3910 |
| CHCHD1      | 25.046 | 20.519 |
| CIRBP       | 7.1158 | 12.072 |
| CKAP4       | 4.5489 | 4.3933 |
| CLTC        | 4.4108 | 8.0408 |
| CNBP        | 4.2261 | 4.6985 |
| CNP         | 9.1921 | 8.4712 |
| CNPY2       | 4.5315 | 9.9427 |
| COA1        | 9.5769 | 5.9919 |
| COA5        | 3.582  | 4.6927 |
| COASY       | 7.1412 | 17.798 |
| COLGALT1    | 7.1436 | 19.162 |
| COPB2       | 4.3649 | 4.3225 |

|                                              |        |        |
|----------------------------------------------|--------|--------|
| COX20                                        | 44.738 | 19.326 |
| COX5B                                        | 6.7483 | 4.7283 |
| COX6C                                        | 5.9542 | 12.005 |
| CPNE1                                        | 4.0305 | 8.2619 |
| CPSF1                                        | 11.239 | 11.449 |
| CPT1A                                        | 11.455 | 5.9683 |
| CRAT                                         | 9.2246 | 21.508 |
| CS                                           | 4.2743 | 8.9360 |
| CSNK2A1;CSNK2A3                              | 5.406  | 9.1625 |
| CSNK2B-LY6G5B-1181;CSNK2B;CSNK2B-LY6G5B--991 | 4.2764 | 8.4647 |
| CSTF1                                        | 7.8726 | 6.1241 |
| CTNND1                                       | 6.5279 | 6.6081 |
| CYB5R3                                       | 4.3975 | 6.3068 |
| CYCS                                         | 6.4601 | 4.6462 |
| CYP20A1                                      | 15.998 | 7.2787 |
| CYP27A1                                      | 12.57  | 19.138 |
| CYP2W1                                       | 7.418  | 7.2647 |
| CYP4F12;CYP4F3                               | 4.6381 | 4.6979 |
| DAP3                                         | 26.302 | 20.546 |
| DARS                                         | 3.4048 | 5.4164 |
| DAZAP1                                       | 11.049 | 6.4003 |
| DDX1                                         | 6.3754 | 7.9379 |
| DDX17                                        | 7.5408 | 9.6989 |
| DDX23                                        | 7.5436 | 4.6345 |
| DDX27                                        | 15.788 | 25.865 |
| DDX39B                                       | 9.7088 | 17.907 |
| DDX5                                         | 8.6273 | 11.573 |
| DDX6                                         | 8.4314 | 5.2297 |
| DENR                                         | 8.4758 | 11.115 |
| DHRS2                                        | 10.42  | 11.313 |
| DHRS7                                        | 7.1265 | 7.7778 |
| DHX15                                        | 7.8913 | 10.814 |
| DLAT                                         | 3.9027 | 4.9865 |
| DLD                                          | 5.6024 | 4.7182 |
| DLG1                                         | 5.64   | 5.3729 |
| DLST                                         | 5.4534 | 8.7325 |
| DNAJA3                                       | 17.857 | 17.006 |
| DPM1                                         | 13.272 | 16.591 |
| DYRK2                                        | 23.808 | 19.198 |
| ECH1                                         | 4.0128 | 4.9964 |

|               |        |        |
|---------------|--------|--------|
| ECI1;DCI      | 3.6635 | 6.2195 |
| ECSIT         | 13.192 | 5.8122 |
| EEF1D         | 3.3455 | 5.2021 |
| EEF1D         | 5.4006 | 8.4028 |
| EEF1G         | 4.0457 | 5.3113 |
| EHD1          | 4.4233 | 6.1278 |
| EHHADH        | 11.196 | 4.2523 |
| EIF2S1        | 6.0262 | 4.8512 |
| EIF2S2        | 7.7404 | 7.5678 |
| EIF2S3        | 6.6745 | 5.2361 |
| EIF3I         | 3.2779 | 6.0742 |
| EIF4A1;EIF4A2 | 4.0481 | 10.232 |
| EIF4A3        | 7.4952 | 11.071 |
| EIF4E         | 10.442 | 8.7497 |
| EIF4H         | 5.9628 | 15.457 |
| EIF5          | 3.3668 | 6.7523 |
| EIF6          | 5.4184 | 7.0044 |
| ELAVL1        | 6.0224 | 5.2528 |
| ENO1          | 6.2681 | 8.8660 |
| EPHX1         | 5.5407 | 5.8474 |
| ERGIC1        | 9.3982 | 5.5436 |
| ERH           | 10.892 | 19.151 |
| ERP29         | 3.525  | 5.2313 |
| ERP44         | 7.8259 | 14.152 |
| ESD           | 3.9983 | 7.7272 |
| ETFA          | 5.0687 | 9.1900 |
| ETFB          | 3.7093 | 4.5556 |
| ETFDH         | 12.099 | 15.181 |
| EWSR1         | 6.8007 | 12.646 |
| FAF2          | 10.252 | 5.4973 |
| FAM213A       | 4.2905 | 6.2363 |
| FAM98B        | 5.0136 | 5.2866 |
| FARP1         | 10.165 | 13.191 |
| FARSA         | 10.274 | 5.1010 |
| FASN          | 4.0315 | 9.6685 |
| FGB           | 3.9782 | 4.0934 |
| FH            | 5.7977 | 13.255 |
| FNDC3A        | 5.2475 | 4.0709 |
| FOXRED1       | 22.75  | 7.7541 |
| FTSJ3         | 12.927 | 23.490 |

|                                                                                                           |        |                |
|-----------------------------------------------------------------------------------------------------------|--------|----------------|
| FUBP1                                                                                                     | 7.1495 | 4.4892         |
| FUBP3                                                                                                     | 5.7016 | 4.1739         |
| FUS                                                                                                       | 3.9472 | 7.9611         |
| FXR1                                                                                                      | 11.292 | 20.362         |
| G3BP1                                                                                                     | 19.614 | 23.528         |
| G3BP2                                                                                                     | 10.79  | 19.385         |
| GADD45GIP1                                                                                                | 35.131 | 26.840         |
| GALNT2                                                                                                    | 4.9321 | 6.4728         |
| GANAB                                                                                                     | 3.0314 | 7.1984         |
| GAPDH                                                                                                     | 10.375 | 11.158         |
| GDI2                                                                                                      | 5.5452 | 10.301         |
| GLG1                                                                                                      | 7.963  | 10.763         |
| GLS                                                                                                       | 5.5625 | 9.3753         |
| GLUD1;GLUD2                                                                                               | 8.6986 | 16.379         |
| GNAI3                                                                                                     | 7.3217 | 4.8869         |
| GNB2L1                                                                                                    | 9.8019 | 7.3307         |
| GPR179                                                                                                    | 4.0248 | 5.9976         |
| GRHPR                                                                                                     | 4.8325 | 6.8920         |
| GRPEL1                                                                                                    | 3.0564 | 6.9682         |
| GSTK1                                                                                                     | 3.2589 | 4.3810         |
| HADHA                                                                                                     | 10.175 | 8.2912         |
| HADHB                                                                                                     | 11.779 | 15.407         |
| hCG_1984214;MRPS17                                                                                        | 36.396 | 66.393         |
| HDLBP                                                                                                     | 15.65  | 30.416         |
| HIBADH                                                                                                    | 4.5489 | 5.6809         |
| HIST1H1C;HIST1H1E;HIST1H1D                                                                                | 16.8   | 17.889         |
| HIST1H2BI;HIST1H2BN;HIST1H2BL;HIST1H2BM;HIST1H2BH;HIST2H2BF;HIST1H2BC;HIST1H2BD;H2BFS;HIST1H2BK;HIST1H2BA | 9.8252 | 14.734         |
| HK2                                                                                                       | 8      | 4.8256         |
| HKDC1                                                                                                     | 6.0231 | 4.9880         |
| HMGA1                                                                                                     | 7.1917 | 13.340         |
| HMGA2                                                                                                     | 10.475 | 19.862         |
| HNF4A                                                                                                     | 12.812 | 6.2239         |
| HNRNPA0                                                                                                   | 5.0932 | 5.8819         |
| HNRNPA1;HNRNPA1L2                                                                                         | 5.8287 | 8.5459         |
| HNRNPA2B1                                                                                                 | 6.0145 | 9.4077         |
| HNRNPA3                                                                                                   | 6.239  | 9.2669         |
| HNRNPAB                                                                                                   | 7.7167 | 7.0795         |
| HNRNPC;HNRNPCL4;HNRNPCL1;HNRNPCL3;HNRNPCL2                                                                | 5.5526 | 6.2346<br>7325 |

|                         |        |        |
|-------------------------|--------|--------|
| HNRNPD                  | 7.0031 | 5.1218 |
| HNRNPDL                 | 5.1058 | 7.2245 |
| HNRNPF                  | 7.9058 | 5.9188 |
| HNRNPH1                 | 7.3584 | 5.4864 |
| HNRNPH2                 | 7.4042 | 7.1614 |
| HNRNPH3                 | 3.4706 | 6.5536 |
| HNRNPK                  | 9.1354 | 12.722 |
| HNRNPL                  | 5.1087 | 5.8670 |
| HNRNPM                  | 4.2871 | 9.8188 |
| HNRNPR                  | 8.2508 | 9.9738 |
| HNRNPU                  | 12.485 | 14.453 |
| HNRNPUL2;HNRNPUL2-BSCL2 | 7.44   | 8.2512 |
| HP;HPR                  | 25.219 | 5.9616 |
| HSD17B10                | 7.5521 | 12.334 |
| HSD17B4                 | 6.6805 | 6.7500 |
| HSP90AA1                | 4.0809 | 10.016 |
| HSPA9                   | 11.564 | 12.110 |
| HSPB1                   | 3.6846 | 6.7402 |
| HSPD1                   | 3.0593 | 4.8293 |
| HSPE1                   | 4.2561 | 6.0910 |
| HSPH1                   | 75.911 | 179.67 |
| HTRA2                   | 8.6805 | 7.9930 |
| IARS2                   | 9.481  | 14.300 |
| ICT1                    | 31.002 | 28.581 |
| IDH1                    | 4.1271 | 7.3310 |
| IDH3A                   | 4.6764 | 6.7523 |
| IGF2BP1                 | 10.102 | 17.119 |
| IGF2BP2                 | 9.714  | 15.253 |
| IGF2BP3                 | 6.8935 | 12.145 |
| ILF2                    | 6.6558 | 10.037 |
| ILF3                    | 11.306 | 12.189 |
| ILVBL                   | 10.815 | 4.6135 |
| INSR                    | 3.9848 | 5.8090 |
| IQGAP2                  | 3.7526 | 5.7728 |
| ISY1                    | 9.1333 | 10.451 |
| JUP                     | 5.2926 | 4.5859 |
| KHSRP                   | 6.6947 | 5.4825 |
| KPNB1                   | 5.441  | 5.1407 |
| KTN1                    | 6.112  | 6.8299 |
| LAP3                    | 5.0025 | 9.4649 |

|                       |        |        |
|-----------------------|--------|--------|
| LARP4                 | 10.916 | 12.763 |
| LDHA                  | 7.3066 | 12.699 |
| LEPRE1                | 8.6503 | 14.024 |
| LETM1                 | 7.3245 | 4.6214 |
| LGALS8                | 7.264  | 9.5108 |
| LIN7C                 | 5.5845 | 4.6217 |
| LMAN1                 | 6.5711 | 10.321 |
| LMAN2                 | 7.8478 | 12.552 |
| LONP1                 | 5.2569 | 11.402 |
| LRPPRC                | 22.077 | 12.968 |
| LRRC59                | 7.6347 | 9.5461 |
| LSM2                  | 4.913  | 5.2031 |
| LSM3                  | 7.0494 | 7.8972 |
| LUC7L2;C7orf55-LUC7L2 | 34.945 | 37.194 |
| LYAR                  | 10.801 | 17.785 |
| MAGT1                 | 8.7962 | 8.7524 |
| MAOB                  | 9.2366 | 5.8641 |
| MAPRE2                | 16.679 | 19.320 |
| MATR3                 | 5.7609 | 8.4552 |
| MCUR1                 | 5.609  | 4.8282 |
| MDH2                  | 8.1507 | 4.7360 |
| METTL17               | 17.784 | 16.369 |
| MFN2                  | 13.7   | 6.8520 |
| MIF                   | 12.394 | 14.476 |
| MLEC                  | 4.5844 | 6.2217 |
| MOGS                  | 7.3026 | 9.8188 |
| MPG                   | 7.9993 | 6.2275 |
| MPI                   | 10.251 | 4.1210 |
| MRPL1                 | 34.045 | 38.390 |
| MRPL10                | 30.244 | 31.219 |
| MRPL11                | 25.685 | 36.804 |
| MRPL12;SLC25A10       | 27.894 | 19.485 |
| MRPL13                | 34.564 | 27.691 |
| MRPL14                | 27.52  | 21.569 |
| MRPL15                | 41.133 | 43.203 |
| MRPL18                | 36.681 | 38.829 |
| MRPL19                | 21.19  | 16.544 |
| MRPL22                | 50.454 | 86.201 |
| MRPL24                | 34.216 | 28.784 |
| MRPL28                | 26.9   | 22.094 |

|         |        |        |
|---------|--------|--------|
| MRPL3   | 29.667 | 37.932 |
| MRPL32  | 25.279 | 19.832 |
| MRPL37  | 20.612 | 15.087 |
| MRPL38  | 31.647 | 33.895 |
| MRPL39  | 36.959 | 26.908 |
| MRPL41  | 32.699 | 35.055 |
| MRPL42  | 30.189 | 23.969 |
| MRPL44  | 31.81  | 33.522 |
| MRPL45  | 31.567 | 30.785 |
| MRPL46  | 31.352 | 30.453 |
| MRPL49  | 29.391 | 24.344 |
| MRPL50  | 29.822 | 21.439 |
| MRPL53  | 33.824 | 18.837 |
| MRPL54  | 35.04  | 38.587 |
| MRPL55  | 34.723 | 32.769 |
| MRPL57  | 47.959 | 85.723 |
| MRPS10  | 28.686 | 30.104 |
| MRPS16  | 20.201 | 26.475 |
| MRPS18B | 35.846 | 39.168 |
| MRPS2   | 26.069 | 31.215 |
| MRPS21  | 52.472 | 92.022 |
| MRPS22  | 31.674 | 39.978 |
| MRPS23  | 32.34  | 38.224 |
| MRPS25  | 27.034 | 33.365 |
| MRPS26  | 35.928 | 50.635 |
| MRPS27  | 24.657 | 31.101 |
| MRPS30  | 25.739 | 17.741 |
| MRPS35  | 28.242 | 30.678 |
| MRPS6   | 21.341 | 26.121 |
| MRPS7   | 16.487 | 20.171 |
| MRPS9   | 32.741 | 33.842 |
| MT-CO2  | 8.3142 | 6.6502 |
| MTERF4  | 13.516 | 20.009 |
| MTIF2   | 20.72  | 16.801 |
| MTPAP   | 35.402 | 36.615 |
| MYH10   | 4.163  | 11.816 |
| MYO1B   | 10.924 | 31.221 |
| MYO1D   | 4.9553 | 13.164 |
| NACA    | 7.4978 | 10.637 |
| NANS    | 4.8731 | 12.629 |



|               |        |        |
|---------------|--------|--------|
| NAP1L4        | 7.088  | 13.355 |
| NAT10         | 11.602 | 25.351 |
| NCL           | 16.678 | 21.710 |
| NCOA3         | 27.44  | 6.0125 |
| NDUFAB1       | 8.3024 | 4.0519 |
| NDUFAF1       | 9.4424 | 4.4430 |
| NDUFB3        | 4.3025 | 4.0987 |
| NDUFB4        | 7.3849 | 7.3423 |
| NDUFB6        | 6.1515 | 4.5062 |
| NDUFB7        | 5.9948 | 4.4327 |
| NDUFB9        | 5.9353 | 4.3857 |
| NFS1          | 6.2772 | 4.8375 |
| NHP2          | 6.5958 | 8.7254 |
| NHP2L1        | 4.9895 | 7.6152 |
| NIPSNAP1      | 5.2029 | 5.2723 |
| NMNAT1        | 7.3849 | 13.990 |
| NNT           | 6.3558 | 4.8351 |
| NO66          | 14.875 | 28.887 |
| NOP56         | 7.3915 | 14.435 |
| NPM1          | 9.5687 | 14.082 |
| NSUN4         | 15.04  | 10.765 |
| NUDT21        | 3.2921 | 5.0258 |
| NUP37         | 13.752 | 17.133 |
| OGDH          | 6.2153 | 9.4699 |
| OXA1L         | 11.363 | 4.6581 |
| P4HA1         | 5.5279 | 11.271 |
| PA2G4         | 6.3167 | 13.578 |
| PABPC1;PABPC3 | 11.641 | 15.895 |
| PABPC4        | 8.0672 | 12.865 |
| PABPN1        | 9.5472 | 11.302 |
| PARP1         | 5.9776 | 14.526 |
| PC            | 7.7919 | 14.157 |
| PCBP1         | 19.694 | 8.2263 |
| PCBP2;PCBP3   | 13.671 | 8.1906 |
| PCK2          | 8.1158 | 16.226 |
| PCK2          | 8.8606 | 18.603 |
| PCYT1A;PCYT1B | 4.0068 | 8.7408 |
| PDF           | 9.7748 | 7.7369 |
| PDHA1         | 12.001 | 10.376 |
| PDHB          | 10.47  | 10.052 |

|                      |        |        |
|----------------------|--------|--------|
| PDHX                 | 4.0385 | 4.3648 |
| PDIA3                | 3.1958 | 8.0836 |
| PDIA3                | 3.5797 | 8.4492 |
| PDLIM2               | 3.3095 | 4.8783 |
| PGAM5                | 8.888  | 9.7276 |
| PGK1                 | 7.0357 | 15.858 |
| PGRMC1               | 6.9487 | 7.3254 |
| PGRMC2               | 6.081  | 5.1841 |
| PHF5A                | 10.606 | 6.1713 |
| PIN1                 | 3.1247 | 4.7883 |
| PIPOX                | 3.149  | 5.6976 |
| PKM                  | 6.3094 | 9.6660 |
| PKP2                 | 3.7733 | 6.0348 |
| PKP3                 | 5.2426 | 7.5855 |
| PLEC                 | 6.4736 | 11.436 |
| PLOK                 | 4.0294 | 7.4751 |
| PLRG1                | 5.863  | 6.5225 |
| POLDIP2              | 8.5434 | 6.0402 |
| POLR1A               | 12.441 | 16.640 |
| POR                  | 5.9435 | 8.0015 |
| PPIA                 | 5.9875 | 9.1631 |
| PPIB                 | 3.4619 | 7.4882 |
| PPP1CA;PPP1CC;PPP1CB | 6.7604 | 9.8836 |
| PPP1R8               | 4.6534 | 5.5798 |
| PRDX3                | 6.3759 | 8.1032 |
| PRKAR1A              | 4.0694 | 8.2851 |
| PRKAR2A              | 4.4033 | 6.2143 |
| PRKDC                | 26.287 | 24.017 |
| PROS1                | 3.8673 | 4.2996 |
| PRPF19               | 5.2765 | 6.0861 |
| PRPF40A              | 5.6107 | 7.2517 |
| PSMA3                | 3.189  | 4.2746 |
| PTBP1                | 6.4362 | 8.8571 |
| PTCD3                | 30.752 | 36.097 |
| PTPN1                | 6.0949 | 5.7651 |
| PTRF                 | 5.9752 | 5.3767 |
| PTRH2                | 5.7043 | 4.1103 |
| PURA                 | 14.288 | 18.227 |
| PYCR1                | 5.8306 | 11.328 |
| RAB10                | 10.919 | 12.314 |

|                      |        |        |
|----------------------|--------|--------|
| RAB11A;RAB11B        | 8.5809 | 13.460 |
| RAB1A;RAB1B          | 7.6969 | 11.457 |
| RAB22A               | 10.775 | 10.071 |
| RAB5C                | 6.4399 | 7.0595 |
| RAB6A;RAB6B;RAB39A   | 4.9046 | 6.6563 |
| RAB7A                | 6.8133 | 8.9095 |
| RABL3                | 6.5358 | 5.2657 |
| RAC1;RAC2;RAC3       | 8.2082 | 7.3359 |
| RAD50                | 107.38 | 60.506 |
| RALA                 | 4.4734 | 5.4390 |
| RALGAPA2             | 12.259 | 5.7681 |
| RALY                 | 5.4513 | 6.5794 |
| RANGAP1              | 7.0584 | 5.4907 |
| RAP1A                | 8.1238 | 8.6928 |
| RBBP4                | 5.6994 | 7.0260 |
| RBM25                | 5.733  | 5.9426 |
| RBM39                | 11.697 | 11.710 |
| RBM47                | 10.106 | 9.6019 |
| RBMX;RBMXL1          | 4.7274 | 7.2378 |
| RCN2                 | 4.8404 | 4.8887 |
| RDX;MSN              | 6.2587 | 7.0993 |
| RHOA                 | 8.7813 | 7.9771 |
| RPL10                | 13.711 | 23.769 |
| RPL10A               | 20.408 | 35.523 |
| RPL11                | 8.5617 | 6.0536 |
| RPL12                | 6.1907 | 6.2088 |
| RPL13                | 6.1798 | 14.103 |
| RPL14                | 7.0442 | 13.818 |
| RPL15                | 6.0564 | 11.653 |
| RPL17;RPL17-C18orf32 | 14.285 | 26.337 |
| RPL18A               | 7.5218 | 13.722 |
| RPL21                | 10.405 | 18.748 |
| RPL22                | 10.45  | 17.629 |
| RPL23                | 10.267 | 14.937 |
| RPL23A               | 18.187 | 25.542 |
| RPL26;RPL26L1        | 7.8764 | 13.779 |
| RPL27                | 15.892 | 24.317 |
| RPL27A               | 5.7073 | 10.434 |
| RPL28                | 11.207 | 24.487 |
| RPL29                | 19.734 | 27.052 |

|                      |        |        |
|----------------------|--------|--------|
| RPL3                 | 11.04  | 24.589 |
| RPL30                | 9.6276 | 16.876 |
| RPL31                | 18.553 | 26.399 |
| RPL32                | 5.5349 | 9.8192 |
| RPL34                | 9.2173 | 16.847 |
| RPL38                | 4.345  | 4.3371 |
| RPL5                 | 6.6924 | 13.096 |
| RPL6                 | 12.546 | 20.813 |
| RPL7                 | 11.516 | 21.260 |
| RPL7A                | 9.0496 | 19.941 |
| RPL8                 | 13.124 | 20.859 |
| RPL9                 | 8.5212 | 11.016 |
| RPLP0;RPLPOP6        | 7.262  | 10.313 |
| RPLP2                | 7.9768 | 8.8453 |
| RPN2                 | 7.8348 | 6.0138 |
| RPS10;RPS10P5        | 7.6124 | 9.7187 |
| RPS11                | 13.856 | 22.409 |
| RPS12                | 17.323 | 5.2231 |
| RPS14                | 18.635 | 16.106 |
| RPS16;ZNF90          | 11.778 | 22.557 |
| RPS17                | 5.2164 | 6.2889 |
| RPS18                | 8.0833 | 12.851 |
| RPS19                | 5.0947 | 5.7210 |
| RPS2                 | 12.809 | 18.607 |
| RPS20                | 13.98  | 5.5390 |
| RPS25                | 17.059 | 23.087 |
| RPS26;RPS26P11       | 10.025 | 20.426 |
| RPS27                | 11.169 | 9.7020 |
| RPS27A;UBB;UBC;UBA52 | 4.0594 | 6.5116 |
| RPS27L               | 8.3125 | 8.5121 |
| RPS3A                | 16.503 | 27.132 |
| RPS4X                | 13.168 | 18.084 |
| RPS5                 | 9.2084 | 7.6538 |
| RPS6                 | 15.563 | 31.098 |
| RPS8                 | 12.848 | 26.266 |
| RPSA                 | 5.1995 | 6.0874 |
| RRBP1                | 9.7828 | 13.024 |
| RSAD1                | 14.26  | 5.5884 |
| RSL1D1               | 15.181 | 24.384 |
| RTCB                 | 7.1733 | 7.7326 |

|                |        |        |
|----------------|--------|--------|
| RUVBL2         | 13.486 | 6.4240 |
| SAFB           | 5.1493 | 7.4291 |
| SART1          | 5.2033 | 7.3896 |
| SCD            | 9.7241 | 4.5743 |
| SCP2           | 3.0663 | 6.7550 |
| SDC4           | 5.7953 | 4.5496 |
| SEC13          | 5.5185 | 9.3957 |
| SEC22B         | 6.2346 | 7.6198 |
| SERBP1         | 5.1523 | 8.0110 |
| SET            | 56.699 | 47.506 |
| SETDB1         | 24.029 | 29.617 |
| SF3B1          | 6.0253 | 7.8887 |
| SFPQ           | 4.571  | 6.8673 |
| SFXN4          | 15.274 | 4.0966 |
| SLC25A19       | 13.095 | 4.6507 |
| SLC25A20       | 23.66  | 5.8622 |
| SLC25A22       | 16.38  | 4.2698 |
| SLC25A24       | 12.858 | 6.0820 |
| SLC25A4        | 20.623 | 4.7337 |
| SLC25A5        | 19.094 | 8.2876 |
| SLC27A2        | 6.3827 | 6.3138 |
| SLFN5          | 20.113 | 22.224 |
| SLIRP          | 16.823 | 8.6828 |
| SND1           | 11.035 | 23.458 |
| SNRK           | 41.9   | 192.12 |
| SNRNP200       | 7.1945 | 4.6100 |
| SNRNP40        | 8.0474 | 5.0485 |
| SNRNP70        | 4.3954 | 4.8195 |
| SNRPA1         | 3.0885 | 4.2214 |
| SNRPD2         | 3.7984 | 4.7767 |
| SNRPD3         | 5.6649 | 7.8215 |
| SNRPF          | 4.5035 | 5.2789 |
| SNRPG;SNRPGP15 | 5.5008 | 7.1266 |
| SNTB1          | 13.005 | 10.948 |
| SON            | 3.9034 | 4.3864 |
| SORL1          | 12.834 | 9.2630 |
| SRC            | 6.4712 | 4.3410 |
| SRP14          | 8.4334 | 14.314 |
| SRP68          | 5.8732 | 6.2864 |
| SRPRB          | 11.848 | 4.7214 |

|                |        |                |
|----------------|--------|----------------|
| SRRM2          | 7.6902 | 9.1731         |
| SRRT           | 5.2493 | 7.4357         |
| SRSF1          | 4.5663 | 4.9814         |
| SRSF10;SRSF12  | 12.23  | 16.259         |
| SRSF2;SRSF8    | 9.2968 | 8.8633         |
| SRSF3          | 12.228 | 11.769         |
| SRSF6;SRSF4    | 10.557 | 14.713         |
| SRSF7          | 6.1741 | 8.7803         |
| SRSF9          | 6.9256 | 11.850         |
| SSBP1          | 7.6189 | 8.2948         |
| SSRP1          | 6.0428 | 12.248         |
| STARD9         | 22.8   | 19.726         |
| SUB1           | 3.8801 | 6.3714         |
| SYNCRIP        | 8.731  | 13.447         |
| TAF15          | 4.1629 | 7.8521         |
| TARDBD         | 7.8166 | 6.4344         |
| TCEB1          | 10.055 | 5.9609         |
| TCEB3          | 5.956  | 10.168         |
| TF             | 18.025 | 31.186         |
| TFAM           | 9.0559 | 11.580         |
| TFRC           | 9.8691 | 6.4787         |
| THRAP3         | 10.457 | 17.966<br>4278 |
| TIMM10B        | 8.7311 | 4.2934         |
| TIMM23B;TIMM23 | 15.494 | 4.2676         |
| TIMM50         | 5.4961 | 4.7039         |
| TJP1           | 4.4303 | 11.953         |
| TOMM20         | 5.6359 | 4.3587         |
| TOR1AIP1       | 6.9151 | 4.5300         |
| TRA2A          | 6.1621 | 8.3445         |
| TRA2B          | 7.3613 | 9.8474         |
| TRAP1          | 6.723  | 17.757         |
| TRIM25         | 13.507 | 17.654         |
| TRIM28         | 7.5069 | 7.7036         |
| TRIO           | 12.051 | 13.299         |
| TRMT10C        | 13.976 | 26.120         |
| TRMT61B        | 10.982 | 4.0140         |
| TUBG1;TUBG2    | 10.059 | 9.0785         |
| TUFM           | 5.8246 | 4.6377         |
| TXNL1          | 5.8522 | 11.018         |

|                      |        |        |
|----------------------|--------|--------|
| U2AF1                | 5.3372 | 5.7191 |
| U2AF2                | 4.7899 | 5.3637 |
| UCHL3                | 3.0983 | 6.0584 |
| UGT1A3;UGT1A5        | 6.2226 | 4.1315 |
| UGT2B7;UGT2B4        | 10.141 | 4.4806 |
| UPF1                 | 9.9602 | 13.037 |
| UQCRB                | 7.9211 | 4.3044 |
| UQCRC1               | 11.844 | 8.7909 |
| UQCRC2               | 16.242 | 7.1415 |
| UQCRFS1;UQCRFS1P1    | 22.238 | 6.3900 |
| USO1                 | 21.529 | 24.436 |
| USP7                 | 4.4757 | 5.8405 |
| VIL1                 | 7.3211 | 15.704 |
| VWA8                 | 17.068 | 10.396 |
| WARS2                | 9.7112 | 17.198 |
| WBSCR16              | 22.491 | 12.374 |
| WDR1                 | 12.576 | 29.501 |
| WDR12                | 5.81   | 10.025 |
| WDR33                | 8.5641 | 9.3447 |
| WDR61                | 5.669  | 6.8960 |
| WTAP                 | 4.5109 | 5.8167 |
| XRCC5                | 7.1676 | 10.868 |
| XRCC6                | 6.7857 | 11.306 |
| YBX1;YBX3;YBX2       | 25.566 | 26.516 |
| YME1L1               | 9.1378 | 5.2013 |
| YTHDF3;YTHDF2;YTHDF1 | 7.3944 | 10.645 |
| YWHAB                | 3.8406 | 7.0294 |
| YWHAG                | 3.7605 | 5.3714 |
| YWHAZ                | 3.0477 | 4.9964 |
| ZC3H18               | 13.459 | 16.922 |
| ZC3HAV1              | 8.7916 | 11.026 |
| ZFR                  | 11.472 | 8.6626 |
| ZNF207               | 3.7591 | 4.3503 |
| ZNF830               | 7.6724 | 5.7509 |
