# Supplementary material for: Nucleolin binds to and regulates transcription of hepatitis B virus covalently closed circular DNA minichromosome
Source: PubMed Central journal article supplement — Proc Natl Acad Sci U S A. 2023 Nov 28;120(49):e2306390120. doi: 10.1073/pnas.2306390120 (PMC10710063; doi:10.1073/pnas.2306390120), 2023-11-28
Supplement: pnas.2306390120.sd02.pdf [file pnas.2306390120.sd02.pdf]

## Dataset S2: Lockdown probe sequences

| ID | Sequence                                                               |
|----|------------------------------------------------------------------------|
| 1  | /5Biosg/TGCAGTGGAACTCCACAACCTTCCACCAAACCTCTGCAAGATCCCAGAGTGAGAGGCCCTGT |
| 2  | /5Biosg/TTCAGTGGAACTCCACCACATTTTCATCAAGCTCTGCTAGATCCCAGAGTAAGGGGCCAT   |
| 3  | /5Biosg/TGCAGTGGAAATTCACCTGCCTTCCACCAAGCTCTGCAGGATCCCAGAGTCAGGGGTCTGT  |
| 4  | /5Biosg/TGCAGTGGAACTCCACCACGTTCCACCAAACCTCTTCAAGATCCCAGAGTCAGGGCTCTGT  |
| 5  | /5Biosg/TCCCAGAGTCAGGGCTCTGTACTTCCCTGCTGGTGGCTCCAGTTCAGGAACAGTGAACCC   |
| 6  | /5Biosg/TCCCAGAGTAAGGGGCCATATACTTCCCTGCTGGTGGCTCCAGTTCGGGAACAGCAAACCC  |
| 7  | /5Biosg/TCCCAGAGTGAGAGGCCCTGTATTTCCCTGCTGGTGGCTCCAGTTCAGGAACAGTAAACCC  |
| 8  | /5Biosg/TCCCAGAGTCAGGGGTCTGTATTTTCCCTGCTGGTGGCTCCAGTTCAGGAACAGTAAACCC  |
| 9  | /5Biosg/AGTTCCGGAACAGCAAACCCCTGTTCGACTACTGCCTCTCCCATATCGTCAATCTTCTCG   |
| 10 | /5Biosg/AGTTCAGGAACAGTAAACCCCTGTTCGACTACTGTCTCTCCCATATCGTCAATCTTCTCG   |
| 11 | /5Biosg/AGTTCAGGAACAGTAAACCCCTGCTCCGAATATTGCCTCTCACATCTCGTCAATCTCCGCG  |
| 12 | /5Biosg/AGTTCAGGAACAGTGAACCCCTGTTCAGACCACTGCCTCTTCCATATCGTCAATCTTATCG  |
| 13 | /5Biosg/ACATCTCGTCAATCTCCGCGAGGACTGGGGACCCTGTGACGAACATGGAGAACATCACAT   |
| 14 | /5Biosg/CCATATCGTCAATCTTATCGAAGACTGGGGACCCTGTGCCGAACATGGAGAACATCGAAT   |
| 15 | /5Biosg/CCATATCGTCAATCTTCTCGAGGATTGGGGACCCTGCGCTGAACATGGAGAACATCACAT   |
| 16 | /5Biosg/CCATATCGTCAATCTTCTCGAGGACTGGGGACCCTGCACCGAACATGGAGAACACAACAT   |
| 17 | /5Biosg/GAACATGGAGAACACAACATCAGGATTCCTAGGACCCCTGCTCGTGTTACAGGCGGGGTT   |
| 18 | /5Biosg/GAACATGGAGAACATCGAATCAGGACTCCTAGGACCCCTGCTCGTGTTACAGGCGGGGTT   |
| 19 | /5Biosg/GAACATGGAGAACATCACATCAGGATTCCTAGGACCCCTGCTCGTGTTACAGGCGGGGTT   |
| 20 | /5Biosg/CTCGTGTTACAGGCGGGGTTTTTCTTGTGACAAAAATCCTCACAATACCACAGAGTCTA    |
| 21 | /5Biosg/CTCGTGTTACAGGCGGGGTTTTTCTTGTGACAAAAATCCTCACAATACCGCAGAGTCTA    |
| 22 | /5Biosg/CTCGTGTTACAGGCGGGGTTTTTCTTGTGACAAGAATCCTCACAATACCGCAGAGTCTA    |
| 23 | /5Biosg/TCACAATACCACAGAGTCTAGACTCGTGGTGGACTTCTCTCAATTTTCTAGGGGGAGCAC   |
| 24 | /5Biosg/TCACAATACCGCAGAGTCTAGACTCGTGGTGGACTTCTCTCAATTTTCTAGGGGGAACAC   |
| 25 | /5Biosg/TCACAATACCGCAGAGTCTAGACTCGTGGTGGACTTCTCTCAATTTTCTAGGGGGAACTA   |
| 26 | /5Biosg/TCACAATACCGCAGAGTCTAGACTCGTGGTGGACTTCTCTCAATTTTCTAGGGGGATCAC   |
| 27 | /5Biosg/CAATTTTCTAGGGGGATCACCCGTGTGTCTTGGCCAAAATTCGCAGTCCCCAACCTCCAA   |
| 28 | /5Biosg/CAATTTTCTAGGGGGAGCACCCACGTGTCTTGGCCAAAATTCGCAGTCCCCAACCTCCAA   |
| 29 | /5Biosg/CAATTTTCTAGGGGGAACACCCGTGTGTCTTGGCCAAAATTCGCAGTCCCCAACCTCCAG   |
| 30 | /5Biosg/CAATTTTCTAGGGGGAACACCCGTGAGTCTTGGCCAAAATTCGCAGTCCCCAACCTCCAA   |
| 31 | /5Biosg/TCGCAGTCCCCAACCTCCAGTCACTACCAACTTGTGTCTCCGATTTGTCTGGTTAT       |
| 32 | /5Biosg/TCGCAGTCCCCAACCTCCAATCACTACCAACTCCTGTCTCCAACTTGTCTGGTTAT       |
| 33 | /5Biosg/TCGCAGTCCCCAACCTCCAATCACTACCAACTCTTGTCTCCAATTTGTCTGGCTAT       |
| 34 | /5Biosg/TCGCAGTCCCCAACCTCCAATCACTACCAACTCCTGTCTCCAATTTGTCTGGTTAT       |
| 35 | /5Biosg/CTCCAATTTGTCTGGCTATCGCTGGATGTGTCTGCGGCGTTTTATCATATTCCTCTTCA    |
| 36 | /5Biosg/CTCCAATTTGTCTGGTTATCGCTGGATGTGTCTGCGGCGTTTTATCATCTTCTCTTCA     |
| 37 | /5Biosg/CTCCGATTTGTCTGGTTATCGCTGGATGTGTCTGCGGAGTTTTATCATCTTCTTGTCA     |
| 38 | /5Biosg/CTCCAATTTGTCTGGTTATCGCTGGATGTGTCTGCGGCGTTTTATCATATTCCTCTTCA    |
| 39 | /5Biosg/TTTTATCATATTCCTCTTTCATCTGCTGCTATGCCTCATCTTCTTATTGGTTCTTCTGGA   |

|    |                                                                         |
|----|-------------------------------------------------------------------------|
| 40 | /5Biosg/TTTTATCATATTCCTCTTCATCCTGCTGCTATGCCTCATCTTCTTGTGGTTCTTCTGGA     |
| 41 | /5Biosg/TTTTATCATCTTCCTCTTCATCCTGCTGCTATGCCTCATCTTCTTGTGGTTCTTCTGGA     |
| 42 | /5Biosg/TTTTATCATCTTCCTTTGCATCCTGCTGCTATGCCTCATGTTCTTGTGGTTCTTCTGGA     |
| 43 | /5Biosg/TTCTTATTGGTTCTTCTGGATTATCAAGGTATGTTGCCCGTTTGTCCCTCTAATTCAGGA    |
| 44 | /5Biosg/TTCTTGTGGTTCTTCTGGACTACCAAGGTATGTTGCCCGTTTGTCCCTCTAATTCAGGA     |
| 45 | /5Biosg/TTCTTGTGGTTCTTCTGGACTATCAAGGTATGTTGCCCGTTTGTCCCTCTAATTCAGGA     |
| 46 | /5Biosg/TTTGTCCCTCTAATTCAGGATCATCCACCACCAGCACCGGACCATGCAGAACCTGCACGA    |
| 47 | /5Biosg/TTTGTCCCTCTAATTCAGGAACATCCACAACAAGCACGGGACCATGCAAGACCTGCACGA    |
| 48 | /5Biosg/TTTGTCCCTCTAATTCAGGATCAACAACAACCAGTACGGGACCATGCAAAACCTGCACGA    |
| 49 | /5Biosg/TTTGTCCCTCTAATTCAGGATCTTCAACCACCAGCACGGGACCCTGCAGAACCTGCACGA    |
| 50 | /5Biosg/ACCATGCAGAACCTGCACGACTCCTGCTCAAGGAACCTCTATGTTTCCCTCATGTTGCTG    |
| 51 | /5Biosg/ACCATGCAAAACCTGCACGACTCCTGCTCAAGGCAACTCTATGTTTCCCTCATGTTGCTG    |
| 52 | /5Biosg/ACCATGCAAGACCTGCACGACTCCTGCTCAAGGCACCTCTATGTTTCCCTCTTGTGCTG     |
| 53 | /5Biosg/ACCCTGCAGAACCTGCACGACTCCTGCTCAAGGAACCTCTATGTATCCCTCTTGTGCTG     |
| 54 | /5Biosg/ATGTTTCCCTCATGTTGCTGTACAAAACCTACGGATGGAAATTGCACCTGTATTCCCATC    |
| 55 | /5Biosg/ATGTTTCCCTCATGTTGCTGTACAAAACCTACGGACGGAAACTGCACCTGTATTCCCATC    |
| 56 | /5Biosg/ATGTATCCCTCTTGTGCTGTACAAAACCTCGGACGGAAATTGCACCTGTATTCCCATC      |
| 57 | /5Biosg/ATGTTTCCCTCTTGTGCTGTACAAAACCTTCGGACGGAAACTGCACCTGTATTCCCATC     |
| 58 | /5Biosg/ATTGCACCTGTATTCCCATCCCATCATCTTGGGCTTTCGAAAATTCCCTATGGGAGTGGG    |
| 59 | /5Biosg/ACTGCACCTGTATTCCCATCCCATCATCTTGGGCTTTCGAAAATACCTATGGGAGTGGG     |
| 60 | /5Biosg/ACTGCACCTGTATTCCCATCCCATCATCTTGGGCTTTCGAAAATTCCCTATGGGAGTGGG    |
| 61 | /5Biosg/ATTGCACCTGTATTCCCATCCCATCGTCTTGGGCTTTCGAAAATACCTATGGGAGTGGG     |
| 62 | /5Biosg/AAAATTCCCTATGGGAGTGGGCCTCAGTCCGTTTCTCCTGGCTCAGTTTACTAGCGCCATT   |
| 63 | /5Biosg/AAAATACCTATGGGAGTGGGCCTCAGTCCGTTTCTCCTGGCTCAGTTTACTAGTGCCATT    |
| 64 | /5Biosg/AAAATTCCCTATGGGAGTGGGCCTCAGCCCCTTCTCCTGGCTCAGTTTACTAGTGCCATT    |
| 65 | /5Biosg/CTCAGTTTACTAGTGCCATTTGTTTTCAGTGGTTTCGTAGGGCTTTCCTCCACTGTCTGGCTT |
| 66 | /5Biosg/CTCAGTTTACTAGTGCCATTTGTTTTCAGTGGTTTCGTAGGGCTTTCCTCCACTGTCTGGCTT |
| 67 | /5Biosg/CTCAGTTTACTAGTGCCATTTGTTTTCAGTGGTTTCGTAGGGCTTTCCTCCACTGTCTGGCTT |
| 68 | /5Biosg/TTTCCCCCACTGTTTGGCTTTCAGCTATATGGATGATGTGGTATTGGGGCCAAGTCTGT     |
| 69 | /5Biosg/TTTCCCCCACTGTCTGGCTTTCAGTTATATGGATGATGTGGTATTGGGGCCAAGTCTGT     |
| 70 | /5Biosg/TTTCCCCCACTGTTTGGCTTTCAGTTATATGGATGATGTGGTATTGGGGCCAAGTCTGT     |
| 71 | /5Biosg/GTTTTGGGGCCAAGTCTGTACAACATCTTGAGTCCCTTTATGCCGCTGTTACCAATTTT     |
| 72 | /5Biosg/GTATTGGGGCCAAGTCTGTACAACATCTTGAGTCCCTTTTACCTCTGTTACCAATTTT      |
| 73 | /5Biosg/GTATTGGGGCCAAGTCTGTACAGCATCTTGAGTCCCTTTTACCGCTGTTACCAATTTT      |
| 74 | /5Biosg/GTATTGGGGCCAAGTCTGTACAGCATCTTGAGTCCCTTTTACCGCTGTTACCAATTTT      |
| 75 | /5Biosg/ATACCGCTGTTACCAATTTTCTTTTGTCTCTGGGTATACATTTAAACCCTAACAAAACAA    |
| 76 | /5Biosg/TTACCTCTGTTACCAATTTTCTTTTGTCTTTGGGTATACATTTGAACCCTCACAAAACCA    |
| 77 | /5Biosg/TTACCGCTGTTACCAATTTTCTTTTGTCTTTGGGTATACATTTAAACCCTAACAAAACAA    |
| 78 | /5Biosg/ATGCCGCTGTTACCAATTTTCTTTTGTCTCTGGGTATACATTTAAACCCTCATAAAACAA    |
| 79 | /5Biosg/TTTAAACCCTAACAAAACAAAAGATGGGGTTATTCCCTAAACTTCATGGGTACATAAT      |
| 80 | /5Biosg/TTTAAACCCTCATAAAACAAAACGATGGGGCTACTCCCTTAACTTCATGGGATATGTAAT    |

|     |                                                                         |
|-----|-------------------------------------------------------------------------|
| 81  | /5Biosg/TTTGAACCTCACAAAACCAAGCGTTGGGGCTACTCCCTTAATTTTCATGGGATATGTAAT    |
| 82  | /5Biosg/TTTAAACCTAACAAAACAAAAAGATGGGGTTACTCTTTACATTTTCATGGGCTATGTCAT    |
| 83  | /5Biosg/AATTTTCATGGGATATGTAATTGGAAGTTGGGGTACCTTACCACAGGATCATATTGTACTA   |
| 84  | /5Biosg/AACTTCATGGGATATGTAATTGGAAGTTGGGGTACCTTACCCCAAGAACATATTGCGTTG    |
| 85  | /5Biosg/AACTTCATGGGTTACATAATTGGAAGTTGGGGAACATTGCCACAGGATCATATTGTACAA    |
| 86  | /5Biosg/CATTTTCATGGGCTATGTCATTGGATGTTATGGGTCATTGCCACAAGATCACATCATAACAG  |
| 87  | /5Biosg/CACAAGATCACATCATAACAGAAAATCAAAGAATGTTTTAGAAAACCTCCTGTAAACAGGC   |
| 88  | /5Biosg/CACAGGATCATATTGTACTAAAAATCAAGCAATGTTTCCGAAAACCTCCTGTAAATCGAC    |
| 89  | /5Biosg/CCAAGAACATATTGCGTTGAAAATCAAACAATGTTTTAGGAAAACCTCCTGTAAACAGGC    |
| 90  | /5Biosg/CACAGGATCATATTGTACAAAAGATCAAACACTGTTTTAGAAAACCTCCTGTAAACAGGC    |
| 91  | /5Biosg/AAAACCTCCTGTAAACAGGCCTATTGATTGGAAAGTCTGTCAACGTATTGTGGGTCTTTT    |
| 92  | /5Biosg/AAAACCTCCTGTAAATCGACCGATAGATTGGAAAGTATGCCAAAGAATTGTGGGTCTTTT    |
| 93  | /5Biosg/GAAACCTCCTGTAAACAGGCCTATTGATTGGAAAGTATGTCAACGAATTGTGGGTCTTTT    |
| 94  | /5Biosg/AAAACCTCCTGTAAACAGGCCTATTGATTGGAAAGTATGTCAAAGAATTGTGGGTCTTTT    |
| 95  | /5Biosg/CAACGAATTGTGGGTCTTTTGGGATTTGCTGCTCCTTTCACACAATGTGGTTATCCTGCT    |
| 96  | /5Biosg/CAACGTATTGTGGGTCTTTTGGGTTTTGCCGCCCTTTTACACAATGTGGTTATCCTGCT     |
| 97  | /5Biosg/CAAAGAATTGTGGGTCTTTTGGGCTTTGCTGCCCCCTTTTACACAATGTGGTTATCCTGCA   |
| 98  | /5Biosg/CAAAGAATTGTGGGTCTTTTGGGCTTTGCTGCTCCATTTACACAATGTGGATATCCTGCC    |
| 99  | /5Biosg/CACAATGTGGTTATCCTGCTTTAATGCCCTTGATGCATGTATTCAATCTAAGCAGGCTT     |
| 100 | /5Biosg/CACAATGTGGATATCCTGCCTTAATGCCTTTGATGCATGTATAACAAGCTAAACAGGCTT    |
| 101 | /5Biosg/CACAATGTGGTTATCCTGCTCTAATGCCTTTATATGCATGTATAACAAGCTAAACAGGCTT   |
| 102 | /5Biosg/CACAATGTGGTTATCCTGCATTACTGCCTTTGATGCATGTATAACAAGCGAAGCAAGCTT    |
| 103 | /5Biosg/TATAACAAGCTAAACAGGCTTTTACTTTCTCGCCAACCTTATAAGGCCTTTCTAAACAAACA  |
| 104 | /5Biosg/TATTCAATCTAAGCAGGCTTTTCACTTTCTCGCCAACCTTACAAGGCCTTTCTGTGTAAACA  |
| 105 | /5Biosg/TATAACAAGCTAAACAGGCTTTTCACTTTCTCGCCAACCTTACAAGGCCTTTCTAAGTAAACA |
| 106 | /5Biosg/TATAACAAGCGAAGCAAGCTTTTCACTTTCTCGCCAACCTTACAAGCTTTTCTGTGTAAACA  |
| 107 | /5Biosg/AAAGCTTTTCTGTGTAAACAATATTTGACCCTTTATCCCCTTGCTCGGCAACGGCCAGGT    |
| 108 | /5Biosg/AAGGCCTTTTCTGTGTAAACAATACCTGAACCTTTACCCCCTTGCTCGGCAACGGCCAGGT   |
| 109 | /5Biosg/AAGGCCTTTTCTAAGTAAACAGTACATGAACCTTTACCCCCTTGCTCGGCAACGGCCAGGT   |
| 110 | /5Biosg/AAGGCCTTTTCTAAACAAACAATATCTGAACCTTTACCCCCTTGCGCGGCAACGGCCAGGT   |
| 111 | /5Biosg/TTGCTCGGCAACGGCCAGGTCTGTGCCAAGTGTGTTGCTGATGCAACCCCCACTGGCTGGG   |
| 112 | /5Biosg/TTGCTCGGCAACGGCCAGGTCTATGCCAAGTGTGTTGCTGATGCAACCCCCACTGGTTGGG   |
| 113 | /5Biosg/TTGCTCGGCAACGGCCTGGTCTGTGCCAAGTGTGTTGCTGACGCAACCCCCACTGGCTGGG   |
| 114 | /5Biosg/TTGCGCGGCAACGGCCAGGTCTGTGCCAAGTGTGTTGCTGACGCAACCCCCACTGGCTGGG   |
| 115 | /5Biosg/TGCAACCCCCACTGGTTGGGGCTTGCCATGGGCCATCGGCGCCTGCGTGGAACCTTTGT     |
| 116 | /5Biosg/CGCAACCCCCACTGGCTGGGGCTTGCCATAGGCCATCAGCGCATGCGTGGGACCTTTGT     |
| 117 | /5Biosg/TGCAACCCCCACTGGCTGGGGCTTGGTCATGGGCCATCAGCGCATGCGTGGGACCTTTTCG   |
| 118 | /5Biosg/CGCATGCGTGGAACCTTTGGGCTCCTCTGCCGATCCATACTGCGGAACCTTCTAGCAGCT    |
| 119 | /5Biosg/CGCATGCGTGGGACCTTTGTGGCTCCTCTGCCGATCCATACTGCGGAACCTCCTAGCCGCT   |
| 120 | /5Biosg/CGCATGCGTGGGACCTTTGTGTCTCCTCTGCCGATCCATACTGCGGAACCTCCTAGCCGCT   |
| 121 | /5Biosg/CGCCTGCGTGGAACCTTTGTGGCTCCTCTGCCGATCCATACTGCGGAACCTCCTGACGCC    |

|     |                                                                       |
|-----|-----------------------------------------------------------------------|
| 122 | /5Biosg/CTGCGGAACTTCTAGCAGCTTGTTTTGCTCGCAGCAGGTCTGGAGCAAACATTTCTCGGGA |
| 123 | /5Biosg/CTGCGGAACTCCTTGACGCTTGTTTTGCTCGCAGCCGGTCTGGAGCAAACCTTATAGGAA  |
| 124 | /5Biosg/CTGCGGAACTCCTAGCCGCTTGTTTTGCTCGCAGCCGGTCTGGAGCAAAGCTCATCGGAA  |
| 125 | /5Biosg/CTGCGGAACTCCTAGCCGCTTGTTTTGCTCGCAGCAGGTCTGGAGCGAAACTTATCGGGA  |
| 126 | /5Biosg/TGGAGCAAAGCTCATCGGAACTGACAATTCTGTGTCCTCTCGCGGAAATATACATCGTT   |
| 127 | /5Biosg/TGGAGCGAAACTTATCGGGACTGACAATTCTGTTGTCCTTTCCCGCAAATATACATCGTT  |
| 128 | /5Biosg/TGGAGCAAACATTTCTCGGGACGGATAACTCTGTTGTTCTCTCCCGCAAATATACATCGTT |
| 129 | /5Biosg/TGGAGCAAACCTTATAGGAACCGACAACCTCTGTTGTCCTTTCTCGGAAATACACCTCGTT |
| 130 | /5Biosg/TCTCGGAAATACACCTCGTTTTCCATGGCTGCTCGGTTGTGCTGCCAACTGGATCCTGCGC |
| 131 | /5Biosg/TCCCGCAAATATACATCGTTTTCCATGGCTGCTAGGCTGTGCTGCCAACTGGATCCTGCGC |
| 132 | /5Biosg/TCCCGCAAATATACATCGTTTTCCATGGCTGCTAGGCTGTGCTGCCAACTGGATCCTACGC |
| 133 | /5Biosg/TCGCGGAAATATACATCGTTTTCCATGGCTGCTAGGCTGTACTGCCAACTGGATCCTTCGC |
| 134 | /5Biosg/CTGCCAACTGGATCCTTCGCGGGACGTCTTTGTTTACGTCCCCTCGGCGCTGAATCCCG   |
| 135 | /5Biosg/CTGCCAACTGGATCCTGCGCGGGACGTCTTTGTTTACGTCCCCTCAGCGCTGAATCCCG   |
| 136 | /5Biosg/CTGCCAACTGGATCCTGCGCGGGACGTCTTTGTCTACGTCCCCTCGGCGCTGAATCCCG   |
| 137 | /5Biosg/CTGCCAACTGGATCCTACGCGGGACGTCTTTGTTTACGTCCCCTCGGCGCTGAATCCCG   |
| 138 | /5Biosg/CCCCTCGGCGCTGAATCCCCTCGGACGACCCCTCTCGGGGCGCTTGGGGCTCTACCGCCC  |
| 139 | /5Biosg/CCCCTCGGCGCTGAATCCCCTCGGACGACCCCTCTCGGGGTCGTTGGGGATCTATCGTCC  |
| 140 | /5Biosg/CCCCTCGGCGCTGAATCCCCTCGGACGACCCCTCTCGGGGCGCTTGGGACTCTCTCGTCC  |
| 141 | /5Biosg/CCCCTCAGCGCTGAATCCCCTCGGACGACCCCTCTCGGGGCGCTTGGGGCTCTCTCGTCC  |
| 142 | /5Biosg/CGCTTGGGGCTCTACCGCCCGCTTCTCCGTCTGCCGTACCGACCGACCACGGGGCGCACC  |
| 143 | /5Biosg/CGCTTGGGGATCTATCGTCCCCTTCTCCGTCTGCCGTTCAGCCGACCACGGGGCGCACC   |
| 144 | /5Biosg/CGCTTGGGACTCTCTCGTCCCCTTCTCCGTCTGCCGTTCAGCCGACCACGGGGCGCACC   |
| 145 | /5Biosg/CGCTTGGGGCTCTCTCGTCCCCTTCTCCGTCTGCCGTTCGACCGACCACGGGGCGCACC   |
| 146 | /5Biosg/GACCGACCACGGGGCGCACCTCTCTTTACGCGGACTCCCCGTCTGTGCCTTCTCATCTGC  |
| 147 | /5Biosg/AGCCGACCACGGGGCGCACCTCTCTTTACGCGGTCTCCCCGTCTGTGCCTTCTCATCTGC  |
| 148 | /5Biosg/GACCGACCACGGGGCGCACCTCTCTTTACGCGGACTCCCCGTCTGTGCCTTCTCGTCTGC  |
| 149 | /5Biosg/GTCTGTGCCTTCTCGTCTGCCGACCGTGTGCACTTCGTTACCTCTGCACGTGCATG      |
| 150 | /5Biosg/GTCTGTGCCTTCTCATCTGCCGTCCTGTGCACTTCGTTACCTCTGCACGTGCATG       |
| 151 | /5Biosg/GTCTGTGCCTTCTCATCTGCCGACCGTGTGCACTTCGTTACCTCTGCACGTGCATG      |
| 152 | /5Biosg/TCACCTCTGCACGTGCATGGAACACCCTGAACGCCACCAGGTCTTGCCCAAGGTCT      |
| 153 | /5Biosg/TCACCTCTGCACGTGCATGGAGACCACCCTGAACGCCCATCAGATCCTTGCCCAAGGTCT  |
| 154 | /5Biosg/TCACCTCTGCACGTGCATGGAGACCACCCTGAACGCCACCAATTTTGCCCAAGGTCT     |
| 155 | /5Biosg/TCACCTCTGCACGTGCATGGAGACCACCCTGAACGCCACCAGGAACTTGCCCAAGGTCT   |
| 156 | /5Biosg/TCAGATCCTTGCCCAAGGTCTTACATAAGAGGACTCTTGACTCCCAGCAATGTCAACGAC  |
| 157 | /5Biosg/CCAGGTCTTGCCCAAGGTCTTACATAAAGGACTCTTGACTCTCAGCAATGTCAACGAC    |
| 158 | /5Biosg/CCAATTTCTTGCCCAAGGTCTTACATAAGAGGACTCTTGACTCTCTGTAATGTCAACGAC  |
| 159 | /5Biosg/CCGAACTTGCCCAAGGTCTTGATAAGAGGACTCTTGACTTTTACAGCAATGTCAACGAC   |
| 160 | /5Biosg/CTCTCTGTAATGTCAACGACCGACCTTGAGGCATACTTCAAAGACTGTTTGTGTTAAGGAC |
| 161 | /5Biosg/CTCCAGCAATGTCAACGACCGACCTTGAGGCATACTTCAAAGACTGTGTGTTAAGGAC    |
| 162 | /5Biosg/CTTTCAGCAATGTCAACGACCGACCTTGAGGCATACTTCAAAGACTGTGTGTTACTGAG   |

|     |                                                                        |
|-----|------------------------------------------------------------------------|
| 163 | /5Biosg/CTCTCAGCAATGTCAACGACCGACCTTGAGGCGTACTTCAAAGACTGTTTGTTTAAAGAC   |
| 164 | /5Biosg/AAGACTGTTTGTTTAAAGACTGGGAGGAGTTGGGGGAGGAGATTAGGTTAATGATCTTTG   |
| 165 | /5Biosg/AAGACTGTGTGTTTAAAGACTGGGAGGAGCTGGGGGAGGAGATTAGGTTAAAGGTCTTTG   |
| 166 | /5Biosg/AAGACTGTTTGTTTAAAGACTGGGAGGAGTTGGGGGAGGAGATTAGATTAATGGTCTTTG   |
| 167 | /5Biosg/AAGACTGTGTGTTTACTGAGTGGGAGGAGTTGGGGGAGGAGATTAGGTTAAAGGTCTTTG   |
| 168 | /5Biosg/GATTAGATTAATGGTCTTTGTATTAGGAGACTGTAAGCATAAATTGGTCTGCGCACCTGC   |
| 169 | /5Biosg/GATTAGGTTAAAGGTCTTTGTACTAGGAGGCTGTAGGCATAAATTGGTCTGTTACCAGC    |
| 170 | /5Biosg/GATTAGGTTAAAGGTCTTTGTATTAGGAGGCTGTAGGCATAAATTGGTCTGCGCACCAGC   |
| 171 | /5Biosg/GATTAGGTTAATGATCTTTGTACTAGGAGGCTGTAGGCATAAATTGGTCTGCGTACCAGC   |
| 172 | /5Biosg/AAATTGGTCTGTTACCAGCACCATGCAACTTTTTACCTCTGCCTAAACATCTCATGTT     |
| 173 | /5Biosg/AAATTGGTCTGCGCACCAGCACCATGCAACTTTTTACCTCTGCCTAATCATCTCTTGTA    |
| 174 | /5Biosg/AAATTGGTCTGCGTACCAGCACCATGCAACTTTTTACCTCTGCCTAATCATCTCATGTT    |
| 175 | /5Biosg/AAATTGGTCTGCGCACCTGCACCATGCAACTTTTTACCTCTGCCTAATCATCTCTTGTT    |
| 176 | /5Biosg/CTGCCTAATCATCTCTTGTACATGTCCACTGTTCAAGCCTCCAAGCTGTGCCTTGGGTG    |
| 177 | /5Biosg/CTGCCTAAACATCTCATGTTTTCATGTCTACTGTTCAAGCCTCCAAGCTGTGCCTTGGGTG  |
| 178 | /5Biosg/CTGCCTAATCATCTCATGTTTTCATGTCTACTGTTCAAGCCTCCAAGCTGTGCCTTGGGTG  |
| 179 | /5Biosg/CTGCCTAATCATCTCTTGTTCATGTCTACTGTTCAAGCCTCCAAGCTGTGCCTTGGGTG    |
| 180 | /5Biosg/TCCAAGCTGTGCCTTGGGTGGCTTTGGGGCATGGACATTGACCCTTATAAAGAATTTGGA   |
| 181 | /5Biosg/TCCAAGCTGTGCCTTGGGTGGCTTTGGGGCATGGACATTGACCCGTATAAAGAATTTGGA   |
| 182 | /5Biosg/TCCAAGCTGTGCCTTGGGTGGCTTTGGGGCATGGACATTGATCCTTATAAAGAATTTGGA   |
| 183 | /5Biosg/ATCCTTATAAAGAATTTGGAGCTACTGTGGAGTTACTCTCGTTTTTGCCTTCTGACTTCT   |
| 184 | /5Biosg/ACCCTTATAAAGAATTTGGAGCTACTGTGGAGTTACTCTCGTTTTTGCCTTCTGACTTCT   |
| 185 | /5Biosg/ACCCGTATAAAGAATTTGGAGCTTCCGTGGAGTTACTCTCTTTTTTGCCTTCTGATTCT    |
| 186 | /5Biosg/ACCCGTATAAAGAATTTGGAGCTTCTGTGGAGTTACTCTCTTTTTTGCCTTCTGACTTCT   |
| 187 | /5Biosg/GTTTTTGCCTTCTGACTTCTTTTCCCTCCGTACAGAGATCTCCTAGACACCGCCTCAGCTCT |
| 188 | /5Biosg/GTTTTTGCCTTCTGACTTCTTTTCCCTCAGTACGAGATCTTCTAGATACCGCCTCAGCTCT  |
| 189 | /5Biosg/TTTTTTGCCTTCTGACTTCTTTTCCCTTCTATTCGAGATCTTCTCGACACAGCCTCTGCTCT |
| 190 | /5Biosg/TTTTTTGCCTTCTGATTTCTTTTCCCTTCTATTCGAGATCTCCTCGACACCGCCTCTGCTCT |
| 191 | /5Biosg/CTCGACACCGCCTCTGCTCTGTATCGGGAGGCCTTAGAGTCTCCGGAACATTGTTACCT    |
| 192 | /5Biosg/CTAGATACCGCCTCAGCTCTATATCGGGAAGCCTTAGAGTCTCCTGAGCATTGTTACCT    |
| 193 | /5Biosg/CTCGACACAGCCTCTGCTCTGTATCGGGAGGCCTTAGAGTCTCCGGAACATTGTTACCT    |
| 194 | /5Biosg/CTAGACACCGCCTCAGCTCTGTATCGAGAAGCCTTAGAGTCTCCTGAGCATTGCTACCT    |
| 195 | /5Biosg/CTCCTGAGCATTGCTCACCTCACCATACTGCACTCAGGCAAGCCATTCTCTGCTGGGGGG   |
| 196 | /5Biosg/CTCCTGAGCATTGTTACCTCACCATACTGCACTCAGGCAAGCAATTCTTTGCTGGGGGG    |
| 197 | /5Biosg/CTCCGGAACATTGTTACCTCACCATACAGCACTCAGGCAAGCTATTCTGTGTTGGGGTG    |
| 198 | /5Biosg/CTCCGGAACATTGTTACCTCACCATACGGCACTCAGGCAAGCTATTCTGTGTTGGGGTG    |
| 199 | /5Biosg/AGCTATTCTGTGTTGGGGTGAGTTGATGAATCTGGCCACCTGGGTGGGAAGTAATTTGGA   |
| 200 | /5Biosg/AGCAATTCTTTGCTGGGGGGAACATAAGACTCTAGCCACCTGGGTGGGTGGTAATTTGGA   |
| 201 | /5Biosg/AGCCATTCTCTGCTGGGGGGAATTGATGACTCTAGCTACCTGGGTGGGTAAATAATTTGGA  |
| 202 | /5Biosg/AGCTATTCTGTGTTGGGGTGAGTTGATGAATCTAGCCACCTGGGTGGGAAGTAATTTGGA   |
| 203 | /5Biosg/TGGGTGGGAAGTAATTTGGAAGACCCAGCATCCAGGGAATTAGTAGTCAGCTATGTCAAT   |

|     |                                                                        |
|-----|------------------------------------------------------------------------|
| 204 | /5Biosg/TGGGTGGGAAGTAATTTGGAAGATCCAGCATCCAGGGAATTAGTAGTCAGCTATGTCAAT   |
| 205 | /5Biosg/TGGGTGGGTAATAATTTGGAAGATCCAGCATCCAGGGATCTAGTAGTCAATTATGTTAAT   |
| 206 | /5Biosg/TGGGTGGGTGGTAATTTGGAAGATCCAATATCCAGGGACCTAGTAGTCAGTTATGTTAAC   |
| 207 | /5Biosg/TAGTAGTCAGTTATGTTAACACTAATATGGGCCATAAGTTTAGGCAACTATTGTGGTTTC   |
| 208 | /5Biosg/TAGTAGTCAGCTATGTCAATGTTAATATGGGCCATAAAATCAGGCACCTGTTGTGGTTTC   |
| 209 | /5Biosg/TAGTAGTCAGCTATGTCAATGTTAATATGGGCCATAAAATCAGACAACCTATTGTGGTTTC  |
| 210 | /5Biosg/TAGTAGTCAATTATGTTAATACTAACATGGGTTTAAAGATCAGGCAACTATTGTGGTTTC   |
| 211 | /5Biosg/CAGGCAACTATTGTGGTTTCATATATCTTGCCTTACTTTTGGGAAGAGAGACTGTACTTGA  |
| 212 | /5Biosg/CAGGCACCTGTTGTGGTTTCACATTTCTTGTCTTACTTTTGGGAAGAGAAAACGGTTCCTGA |
| 213 | /5Biosg/TAGGCAACTATTGTGGTTTCACATTTCTTGTCTCACTTTTGGGAAGAGAAAACAGTCATAGA |
| 214 | /5Biosg/CAGACAACCTATTGTGGTTTCACATTTCTTGTCTTACTTTTGGGAAGAGAAAACGTTCCTGA |
| 215 | /5Biosg/GGAAGAGAGACTGTACTTGAATATTTGGTCTCTTTTGGAGTGTGGATTTCGACTCCTCCA   |
| 216 | /5Biosg/GGAAGAGAAAACGGTTCCTTGAGTATCTGGTGTCTTTCGGGGTGTGGATTTCGTACACCCCC |
| 217 | /5Biosg/GGAAGAGAAAACAGTCATAGAGTATTTGGTGTCTTTCGGAGTGTGGATTTCGACTCCTCCA  |
| 218 | /5Biosg/GGAAGAGAAAACGTTCCTTGAATATTTGGTCTCTTTTGGAGTGTGGATTTCGACTCCTCCT  |
| 219 | /5Biosg/TGTGGATTTCGACTCCTCCTGCATATAGACCCCCAAATGCCCTATCTTATCAACACTTC    |
| 220 | /5Biosg/TGTGGATTTCGACTCCTCCAGCCTATAGACCACCAAATGCCCTATCTTATCAACACTTC    |
| 221 | /5Biosg/TGTGGATTTCGACTCCTCCAGCTTATAGACCACCAAATGCCCTATCTTATCAACACTTC    |
| 222 | /5Biosg/TGTGGATTTCGTACACCCCCGCATATAGGCCACCAAATGCCCTATCTTATCAACACTTC    |
| 223 | /5Biosg/CCCTATCTTATCAACACTTCCGGAACTACTGTTGTTAGACGACGAGGCAGGTCCCCTAG    |
| 224 | /5Biosg/CCCTATCTTATCAACACTTCCGGAACTACTGTTGTTAGACGACGGGACCGAGGCAGGTC    |
| 225 | /5Biosg/CCCTATCTTATCAACACTTCCGGAGACTACTGTTGTTAGACGACGAGGCAGGTCCCCTAG   |
| 226 | /5Biosg/CGACGAGGCAGGTCCCCTAGAAGAAGAACTCCCTCGCCTCGCAGACGAAGGTCTCAATCG   |
| 227 | /5Biosg/CGACGGGACCGAGGCAGGTCCCCTAGAAGAAGAACTCCCTCGCCTCGCAGACGCAGATCT   |
| 228 | /5Biosg/CGCCTCGCAGACGAAGGTCTCAATCGCCGCGTTCGAGAAGATCTCAATCTCGGGAATCTC   |
| 229 | /5Biosg/CGCCTCGCAGACGCAGATCTCAATCGCCGCGTTCGAGAAGATCTCAATCTCGGGAATCTC   |
| 230 | /5Biosg/ATCTCAATCTCGGGAATCTCAATGTTAGTATCCCTTGGACACATAAGGTGGGAACTTTA    |
| 231 | /5Biosg/ATCTCAATCTCGGGAATCTCAATGTTAGTATCCCTTGGACTCATAAGGTGGGAACTTTA    |
| 232 | /5Biosg/TCATAAGGTGGGAACTTTACTGGGCTTTATTCCTCTACAGTACCTATCTTTAATCCTGA    |
| 233 | /5Biosg/TCATAAGGTGGGAACTTTACGGGGCTTTACTCTTCTACGGTACCTAGCTTTAATCCTAA    |
| 234 | /5Biosg/ACATAAGGTGGGAACTTTACTGGGCTTTATTCCTTCTAATGTACCTGTCTTTAACCCTGA   |
| 235 | /5Biosg/TCATAAGGTGGGAACTTTACGGGGCTTTATTCCTTCTACTGTTCTGTCTTTAACCCTCA    |
| 236 | /5Biosg/GTACCTAGCTTTAATCCTAAATGGCAAACCTCCTTCTTTTCTGACATTCATTTGCAGGAG   |
| 237 | /5Biosg/GTACCTATCTTTAATCCTGAATGGCAAACCTCCTTCTTTTCTAAGATTCATTTACAAGAG   |
| 238 | /5Biosg/GTACCTGTCTTTAACCCTGAATGGCAAACCTCCTTCTTTTCTGATATACATTTGCAGGAG   |
| 239 | /5Biosg/GTTCCTGTCTTTAACCCTCATTGGAAAACACCCTCCTTTTCTAATATAACATTTACACCAA  |
| 240 | /5Biosg/CTAATATAACATTTACACCAAGACATTATCAAAAAATGTGAACAATTTGTAGGCCCACTCA  |
| 241 | /5Biosg/CTGATATAACATTTGCAGGAGGACATTATTAATAGATGTCAACAATTTGTGGGCCCGCTTA  |
| 242 | /5Biosg/CTAAGATTCATTTACAAGAGGACATTATTAATAGGTGTCAACAATTTGTGGGACCTCTCA   |
| 243 | /5Biosg/CTGACATTCATTTGCAGGAGGACATCGTTAATAGGTGTGAACAATTTGTGGGACCCCTCA   |
| 244 | /5Biosg/ACAATTTGTGGGACCCCTCACAGTGAATGAAAATAGGAGACTAAAATTGATCATGCCTGC   |

|     |                                                                        |
|-----|------------------------------------------------------------------------|
| 245 | /5Biosg/ACAATTTGTGGGCCCGCTTACTGTAAATGAAAAAAGGAGACTAAAGTTAATTATGCCTGC   |
| 246 | /5Biosg/ACAATTTGTGGGACCTCTCACTGTAAATGAAAAGAGAAGATTGAAATTAATTATGCCTGC   |
| 247 | /5Biosg/ACAATTTGTAGGCCCACTCACAGTCAATGAGAAAAGAAGACTGCAATTGATTATGCCTGC   |
| 248 | /5Biosg/CTAAAGTTAATTATGCCTGCTAGATTTTTTTCCTAACCTTACCAAATATTTGCCCTTAGAT  |
| 249 | /5Biosg/CTGCAATTGATTATGCCTGCTAGGTTTTATCCAAATGTTACCAAATATTTGCCATTGGAT   |
| 250 | /5Biosg/CTAAAATTGATCATGCCTGCTAGGTTTTATCCTAATGTTACTAAATATTTGCCCTTAGAT   |
| 251 | /5Biosg/TTGAAATTAATTATGCCTGCTAGATTCTATCCTACCCACACTAAATATTTGCCCTTAGAC   |
| 252 | /5Biosg/CCAAATATTTGCCCTTAGATAAAGGCATTAACCTTATTATCCTGAACATATAGTTAATC    |
| 253 | /5Biosg/CCAAATATTTGCCATTGGATAAGGGTATTAACCTTATTATCCAGAACATCTAGTTAATC    |
| 254 | /5Biosg/CTAAATATTTGCCCTTAGATAAAGGAATTAACCTTATTATCCAGAGCATGTGGTTAATC    |
| 255 | /5Biosg/CTAAATATTTGCCCTTAGACAAAGGAATTAACCTTATTATCCAGATCAGGTAGTTAATC    |
| 256 | /5Biosg/TCCAGAGCATGTGGTTAATCATTACTTCCAGACGAGACATTATTTACATACTCTTTGGAA   |
| 257 | /5Biosg/TCCAGATCAGGTAGTTAATCATTACTTCCAAACCAGACATTATTTACATACTCTTTGGAA   |
| 258 | /5Biosg/TCCAGAACATCTAGTTAATCATTACTTCCAAACCAGACATTATTTACACACTCTATGGAA   |
| 259 | /5Biosg/TCCTGAACATATAGTTAATCATTACTTCAAACCTAGGCATTATTTGCATACCCTTTGGAA   |
| 260 | /5Biosg/TATTTACACACTCTATGGAAGGCGGGTATATTATATAAGAGAGAAAACAACACATAGCGCC  |
| 261 | /5Biosg/TATTTACATACTCTTTGGAAGGCTGGTATTCTATATAAGAGGGAAACCACACGTAGCGCA   |
| 262 | /5Biosg/TATTTACATACTCTTTGGAAGGCTAGGTATCTTATATAAAAGAGAGACAACACGTAGCGCC  |
| 263 | /5Biosg/TATTTGCATACCCTTTGGAAGGCTGGCATTCTATATAAGAGAGAACTACACGCAGCGCC    |
| 264 | /5Biosg/GAGAAACAACACATAGCGCCTCATTTTGTGGGTCACCATATTCTTGGGAACAAGAGCTAC   |
| 265 | /5Biosg/GAGAGACAACACGTAGCGCCTCATTTTGTGGGTCACCTTATTCTTGGGAACAAGAGCTAC   |
| 266 | /5Biosg/GAGAACTACACGCAGCGCCTCATTTTGTGGGTCACCATATTCTTGGGAACAAGAGCTAC    |
| 267 | /5Biosg/GGGAACCACACGTAGCGCATCATTTTGTGGGTCACCATATTCTTGGGAACAAGAGCTAC    |
| 268 | /5Biosg/TTCTTGGGAACAAGAGCTACAGCATGGGGCAGAATCTTTCCACCAGCAATCCTCTGGGAT   |
| 269 | /5Biosg/TTCTTGGGAACAAGAGCTACAGCATGGGAGGTTGGTCATCAAACCTCGCAAAGGCATGG    |
| 270 | /5Biosg/TTCTTGGGAACAAGAGCTACAGCATGGGAGGTTGGTCCTCAAACCTCGACCAGGCATGG    |
| 271 | /5Biosg/TTCTTGGGAACAAGAGCTACAGCATGGGAGGTTATTCTTCAAACCTCGAAAAGGCATGG    |
| 272 | /5Biosg/AAAACCTCGCAAAGGCATGGGGACGAATCTTTCTGTTCCCAACCCTCTGGGATTCTTTCC   |
| 273 | /5Biosg/CAAACCTCGACCAGGCATGGGGACAAATCTTTCCGTCCCCAATCCTCTGGGATTCTTTCC   |
| 274 | /5Biosg/CAAACCTCGAAAAGGCATGGGGACGAATCTTTCTGTTCCCAATCCTCTGGGATTCTTGCC   |
| 275 | /5Biosg/GGCAGAATCTTTCCACCAGCAATCCTCTGGGATTCTTTCCCGACCACCAGTTGGATCCAG   |
| 276 | /5Biosg/AATCCTCTGGGATTCTTTGCCAGACCATCAGTTGGACCCGGCTTTCCGAGCCAATTCAAAC  |
| 277 | /5Biosg/AATCCTCTGGGATTCTTTCCCGACCACCAGTTGGATCCAGCCTTCAGAGCAAACACCGCA   |
| 278 | /5Biosg/AATCCTCTGGGATTCTTTCCCGATCACCAGTTGGACCCTGCATTCAAAGCCAACCTCCGAC  |
| 279 | /5Biosg/AACCCTCTGGGATTCTTTCCCGATCAGTTGGACCCTGCATTCCGAGCCAACCTCAAAC     |
| 280 | /5Biosg/CTTTCCGAGCCAATTCAAACAATCCAGATTGGGACTTCAACCCCAACAAGGACCCTTGGC   |
| 281 | /5Biosg/CATTCAAAGCCAACCTCCGACAATCCCGATTGGGACCTCAACCCACACAAGGACAACCTGGC |
| 282 | /5Biosg/CATTCGAGCCAACCTCAAACAATCCAGATTGGGACTTCAACCCCATCAAGGACCCTGGC    |
| 283 | /5Biosg/CCTTCAGAGCAAACACCGCAAATCCAGATTGGGACTTCAATCCCAACAAGGACACCTGGC   |
| 284 | /5Biosg/CCCCAACAAGGACCCTTGGCCAGAGGCTTGGCAGGTAGGAGCGGGAGCATTCGGACCAGG   |
| 285 | /5Biosg/CCCACACAAGGACAACCTGGCCGGACTCCAACAAGGTGGGAGTGGGAGCATTCGGGCCGGG  |

|     |                                                                       |
|-----|-----------------------------------------------------------------------|
| 286 | /5Biosg/TCCCAACAAGGACACCTGGCCAGACGCCAACAAGGTAGGAGCTGGAGCATTCGGGCTGGG  |
| 287 | /5Biosg/CCCCATCAAGGACCACCTGGCCAGCAGCCAACCAGGTAGGAGTGGGAGCATTCGGGCCAGG |
| 288 | /5Biosg/GCTGGAGCATTCGGGCTGGGATTCACCCCACCGCACGGAGGCCCTTTTGGGGTGGAGCCCT |
| 289 | /5Biosg/GCGGGAGCATTCGGACCAGGGTTCACCCCACCACACGGCGGCCCTTTTGGGGTGGAGCCCT |
| 290 | /5Biosg/GTGGGAGCATTCGGGCCAGGGCTCACCCCTCCACACGGCGGTATTTTGGGGTGGAGCCCT  |
| 291 | /5Biosg/GTGGGAGCATTCGGGCCGGGATTCACCTCCCCCATGGGGACTGTTGGGGTGGAGCCCT    |
| 292 | /5Biosg/GTATTTTGGGGTGGAGCCCTCAGGCTCAGGGCATATTGACCACAGTGTCAACAATTCCTC  |
| 293 | /5Biosg/GCCTTTTGGGGTGGAGCCCTCAGGCTCAGGGCATACTACAAACCTTGCCAACAAATCCGC  |
| 294 | /5Biosg/GCCTTTTGGGGTGGAGCCCTCAGGCTCAGGGCATATTGACAACAGTGCCAGCAGCTCCTC  |
| 295 | /5Biosg/GACTGTTGGGGTGGAGCCCTCAAGCTCAGGGCATACTCACAACGTGCCAGCAGCTCCTC   |
| 296 | /5Biosg/AACAGTGCCAGCAGCTCCTCCTGCCTCCACCAATCGGCAGTCAGGAAGGCTGCGTAC     |
| 297 | /5Biosg/AACCTTGCCAACAAATCCGCCTCCTGCCTCCACCAATCGCCAGTCAGGAAGGCAGCCTAC  |
| 298 | /5Biosg/AACTGTGCCAGCAGCTCCTCCTGCCTCCACCAATCGGCAGTTAGGAAGGAAGCCTAC     |
| 299 | /5Biosg/CACAGTGTCAACAATTCCTCCTGCCTCCACCAATCGGCAGTCAGGAAGGCAGCCTAC     |
| 300 | /5Biosg/CAGTCAGGAAGGCAGCCTACCCCTCTGTCTCCACCTTTGAGAAACACTCATCCTCAGGCC  |
| 301 | /5Biosg/CAGTCAGGAAGGCAGCCTACTCCCATCTCTCCACCTCTAAGAGACAGTCATCCTCAGGCC  |
| 302 | /5Biosg/CAGTTAGGAAGGAAGCCTACTCCCCTGTCTCCACCTCTAAAAGACACTCATCCTCAGGCC  |
| 303 | /5Biosg/CAGTCAGGAAGGCTGCGTACTCCCATCTCTCCACCTATAAGAGACACTCATCCTCAGGCC  |
| 304 | /5Biosg/GAAACACTCATCCTCAGGCCATGCAGTGAATGCAGTGAACTCCACAACCTTCCACCAA    |
| 305 | /5Biosg/GAGACAGTCATCCTCAGGCCATGCAGTGAATGCAGTGAATTCCTACTGCCTTCCACCAA   |
| 306 | /5Biosg/GAGACACTCATCCTCAGGCCATTAGTGAATTCAGTGAACTCCACCACATTTTCATCAA    |
| 307 | /5Biosg/AAGACACTCATCCTCAGGCCATGCAGTGAATGCAGTGAACTCCACCACGTTCCACCAA    |
